# Supplementary material for: Characterization of the Barley Net Blotch Pathosystem at the Center of Origin of Host and Pathogen
Source: MDPI journal article supplement (doi:10.3390/pathogens8040275), 2019-11-29
Supplement: s1 [file s1]

**Table S1.** Distribution of Net Blotch disease in Israel by site, barley species and ecogeographic membership. The sampling was taken in the years 2015–2017.

| Name              | Species     | Latitude    | Longitude  | Cluster Membership |
|-------------------|-------------|-------------|------------|--------------------|
| ALONEY HABASHAN   | H.S         | 33.04540278 | 35.8340472 | 1                  |
| ALUMIM            | H.S         | 31.45102778 | 34.5173889 | 2                  |
| BEIT DAGAN        | H.V         | 31.99410278 | 34.8190194 | 4                  |
| EL H'HAR          | H.G         | 31.74788889 | 35.0445556 | 1                  |
| GAN YAVNNE        | H.S         | 31.78433333 | 34.70325   | 4                  |
| GAT V             | H.S+H.V     | 31.63005556 | 34.7985    | 2                  |
| GILAT G           | H.G         | 31.33508333 | 34.6646667 | 2                  |
| GIMZU             | H.S         | 31.95255556 | 34.94      | 5                  |
| HARISH            | H.S         | 32.460628   | 35.048189  | 3                  |
| HARUVIT FOREST    | H.S         | 31.72727778 | 34.8706389 | 5                  |
| K.MASARIK         | H.V         | 32.89333333 | 35.1008333 | 3                  |
| KATZIR            | H.S         | 32.484929   | 35.110856  | 3                  |
| KISUFIM           | H.S+H.V     | 31.37805556 | 34.3833611 | 2                  |
| MEYTZAR           | H.S         | 32.76644444 | 35.7337222 | 1                  |
| MITZPE ILAN       | H.S         | 32.460279   | 35.069079  | 3                  |
| MODIEIN           | H.S         | 31.87222222 | 35.0086111 | 5                  |
| NETIV HA'LAMED HE | H.S         | 31.67263889 | 35.0511389 | 1                  |
| NAHAL RAZ         | H.S         | 32.57680556 | 35.0866111 | 3                  |
| RISHON LETZION    | H.S         | 31.97693611 | 34.7885111 | 4                  |
| SHTULIM           | H.S+H.V     | 31.78210556 | 34.6736944 | 4                  |
| TIMRAT            | H.S         | 32.69905556 | 35.2141111 | 5                  |
| TIVON             | H.S         | 32.75388889 | 35.1270556 | 3                  |
| RAMOT MENASHE     | H.S+H.V     | 32.59836111 | 35.0634722 | 3                  |
| ALMAGOR S         | H.S         | 32.91686111 | 35.6010833 | 6                  |
| ALMAGOR S         | H.S+H.B     | 32.90327778 | 35.5998889 | 6                  |
| ALONEY ABA        | H.S         | 32.733      | 35.1683333 | 3                  |
| ALONEY KADIMA     | H.S         | 32.28852778 | 34.9282778 | 3                  |
| AMIAD             | H.S         | 32.91333333 | 35.5431944 | 6                  |
| BEERI             | H.S+H.V     | 31.42886111 | 34.4747778 | 2                  |
| BEIT HANAN G      | H.G         | 31.93611111 | 34.7544444 | 4                  |
| BEIT HANAN S      | H.S         | 31.93361111 | 34.7527778 | 4                  |
| BEIT HASHITA      | H.S         | 32.54475    | 35.4311667 | 6                  |
| BEIT KAMA         | H.S+H.V     | 31.45327778 | 34.7665556 | 2                  |
| BEIT KESHET       | H.S         | 32.72361111 | 35.41      | 5                  |
| BEIT SHEMESH      | H.S         | 31.75138889 | 35.0006944 | 5                  |
| BIKAAT HASHITA    | H.S         | 32.55083333 | 35.4069444 | 6                  |
| BINYAMINA         | H.S         | 32.51805556 | 34.9579167 | 3                  |
| BIZARON           | H.S         | 31.79561111 | 34.7301389 | 4                  |
| DALYA             | H.S         | 32.58775    | 35.0665556 | 3                  |
| DAMOON            | H.S+H.B     | 32.89944444 | 35.1386111 | 3                  |
| EYN HAEMEK        | H.S         | 32.63441667 | 35.0841667 | 3                  |
| FAHEM             | H.S         | 32.38555556 | 35.1665278 | 3                  |
| GAN YAOSHIYA      | H.G         | 32.34461111 | 34.9899444 | 3                  |
| GAT B             | H.S+H.V+H.G | 31.631      | 34.7978056 | 2                  |
| GEFEN S           | H.S         | 31.74638889 | 34.8708611 | 5                  |
| GEFEN V           | H.V         | 31.74638889 | 34.8708611 | 5                  |
| GILAT V           | H.V         | 31.33580556 | 34.6649444 | 2                  |
| GIVAT HAMORE      | H.B         | 32.61833333 | 35.3686111 | 5                  |
| GIVAT HAMORE      | H.S         | 32.62055556 | 35.3372222 | 5                  |
| GIVA'T HATURMUSIM | H.S         | 32.55083333 | 35.4069444 | 6                  |
| GONEN             | H.S+H.V     | 33.12097222 | 35.6421389 | 6                  |
| HAD HALOM         | H.S         | 31.78061111 | 34.67025   | 4                  |
| HAMAT GADER       | H.S+H.G     | 32.68479167 | 35.6670139 | 6                  |

|                         |             |             |            |   |
|-------------------------|-------------|-------------|------------|---|
| HAR GIBORIM             | H.S+H.G     | 32.53208333 | 35.3641667 | 5 |
| HATAYASIM MOUNTAIN      | H.G         | 31.774175   | 35.09      | 1 |
| HAZOREA                 | H.S         | 32.63441667 | 35.0841667 | 3 |
| K. HAROSHET             | H.S         | 32.69416667 | 35.1086111 | 3 |
| KAHAL                   | H.S+H.B     | 32.88675    | 35.5100278 | 6 |
| KFAR DANIEL             | H.S+H.G+H.B | 31.93375    | 34.93225   | 5 |
| KIRYAT TIVON-PESEL ZAID | H.G         | 32.70116667 | 35.1278889 | 3 |
| LAHAV FOREST            | H.S+H.G     | 31.365      | 34.8505556 | 1 |
| MALAHIM FOREST          | H.B         | 31.59841667 | 34.8353611 | 2 |
| MAPALIM JUNCTION        | H.S         | 32.98611111 | 35.7503611 | 1 |
| MITZPE HAREL            | H.S+H.B     | 31.80200278 | 34.9604083 | 5 |
| MITZPE VINIA            | H.S+H.G     | 32.52472222 | 35.3875    | 5 |
| MODIEIN                 | H.G         | 31.87658333 | 35.0096111 | 5 |
| MOSHAV PATISH           | H.G         | 31.33105556 | 34.5503333 | 2 |
| MOTZA EILIT             | H.B         | 31.79555556 | 35.1505556 | 1 |
| NAHAL ETZIONA           | H.G         | 31.67447222 | 35.0210833 | 5 |
| NAHAL GRAR              | H.S+H.G     | 31.37922222 | 34.6158889 | 2 |
| NAHAL KATLAV            | H.S         | 31.73677778 | 35.0785278 | 1 |
| NAHAL LAKISH            | H.S+H.V     | 31.77766667 | 34.6692222 | 4 |
| NAHAL SHIKMA            | H.S         | 31.48672222 | 34.7098611 | 2 |
| NETIVOT                 | H.S         | 31.43252778 | 34.5851389 | 2 |
| NEVE MICHAEL            | H.S         | 31.670546   | 35.007188  | 5 |
| NIRIM                   | H.V         | 31.3395     | 34.3836667 | 2 |
| PURA                    | H.B         | 31.49538889 | 34.7761944 | 2 |
| RAMAT YOHANAN           | H.V         | 32.79852778 | 35.1249167 | 3 |
| RUHAMA                  | H.S         | 31.48672222 | 34.7098611 | 2 |
| SHANI LIVNA             | H.S+H.B     | 31.35397222 | 35.0765083 | 1 |
| SHATA                   | H.S         | 32.5485     | 35.4149167 | 6 |
| SUFA                    | H.S         | 33.03502778 | 35.6908056 | 1 |
| TAL EL                  | H.S         | 32.92511111 | 35.1725    | 3 |
| TAU                     | H.S         | 32.11430556 | 34.8058056 | 4 |
| TEL ARAD                | H.V         | 31.25691667 | 35.1186528 | 1 |
| TIDHAR                  | H.S+H.B     | 31.37922222 | 34.6158889 | 2 |
| TIMRAT                  | H.G+HB      | 32.70111111 | 35.2152778 | 5 |
| TIVON                   | H.S         | 32.70388889 | 35.1270556 | 3 |
| TIVON                   | H.G         | 32.71186111 | 35.1522222 | 3 |
| TZOMET YHUDIYA          | H.S         | 32.90325    | 35.6470833 | 6 |
| YATIR FOREST            | H.S+H.B     | 31.34697222 | 35.0308056 | 1 |
| ZORAA FOREST-TARUM      | H.S+H.B     | 31.78383333 | 34.9775278 | 5 |

Marked examples, indicate sites that *ptt/ptm* isolate was isolated from the sample. The cluster membership is based on the ecogeographic characterises

**Table S2.** Summary of the mean value of the eco-geographic variable.

| Eco-Geographic Group | N Rows | Average Wind January-March | Average Solar Radiation Jan-Mar | Precipitation of Coldest Quarter | Temperature of Coldest Quarter | Temperature Annual Range |
|----------------------|--------|----------------------------|---------------------------------|----------------------------------|--------------------------------|--------------------------|
| 1                    | 13     | 2.160 ± 0.033 **           | 6.753 ± 0.089 **                | 1.05 ± 0.084 **                  | 1.495 ± 0.047 *                | 3.625 ± 0.026 ***        |
| 2                    | 17     | 2.371 ± 0.043 ***          | 7.156 ± 0.012 ***               | 0.726 ± 0.031 *                  | 1.880 ± 0.008 **               | 3.287 ± 0.033 *          |
| 3                    | 22     | 2.373 ± 0.020 ***          | 6.452 ± 0.019 *                 | 1.307 ± 0.025 ***                | 1.848 ± 0.017 **               | 3.248 ± 0.015 *          |
| 4                    | 10     | 2.536 ± 0.023 ****         | 6.909 ± 0.026 **                | 1.265 ± 0.040 **/***             | 1.921 ± 0.01 ***               | 3.235 ± 0.013 *          |

|   |    |                  |                  |                     |                   |                    |
|---|----|------------------|------------------|---------------------|-------------------|--------------------|
| 5 | 19 | 2.166 ± 0.026 ** | 6.756 ± 0.053 ** | 1.156 ± 0.026 **/** | 1.825 ± 0.013 **  | 3.461 ± 0.013 **   |
| 6 | 11 | 1.886 ± 0.032 *  | 6.446 ± 0.034 *  | 1.048 ± 0.039 **    | 1.923 ± 0.01 ***1 | 3.772 ± 0.030 **** |

\*, \*\*, \*\*\*, and \*\*\*\* are represent significant differences between each group and tested in Wilcoxon method ( $P < 0.05$ )

**Table S3.** Aggressiveness of *Pyrenophora teres* isolates on detached leaves and saprophytic.

| Isolate Name | Barke      | Sagiv        | Ma'anit         | Noga        | Saprophytic * |
|--------------|------------|--------------|-----------------|-------------|---------------|
| HS-MA-TI     | 0.399 A    | 0.311 AB     | 0.316 A         | 0.295 A     | 0.627 ABC     |
| HS-MA-ME     | 0.330 AB   | 0.305 AB     | 0.288 ABC       | 0.265 AB    | 0.667 ABC     |
| HS-MA-RM     | 0.292 ABC  | 0.303 AB     | 0.291 AB        | 0.234 ABC   | 0.582 ABC     |
| HS-MA-NR     | 0.329 AB   | 0.282 ABC    | 0.288 AB        | 0.227 ABC   | 0.589 ABC     |
| HS-MA-GY     | 0.286 ABC  | 0.198 A BCDE | 0.214 ABCDEF    | 0.208 ABCD  | 0.581 ABC     |
| HG-TE-EH     | 0.196 ABCD | 0.189 A BCDE | 0.136 BCDEFGH   | 0.207 ABCD  | 0.580 ABC     |
| HS-MA-RI     | 0.310 ABC  | 0.236 ABCD   | 0.222 ABCDE     | 0.194 ABCD  | 0.559 ABC     |
| HS-MA-NM     | 0.306 ABC  | 0.281 ABC    | 0.241 ABCD      | 0.183 ABCD  | 0.680 AB      |
| HV-TE-G A    | 0.216 ABCD | 0.160 CDEF   | 0.136 BCDEFGH   | 0.165 ABCDE | 0.409 BCDE    |
| HS-TE-MO     | 0.189 ABCD | 0.141 CDEF   | 0.088 FGHI      | 0.164 ABCDE | 0.391 CDEF    |
| HV-TE-NRM    | 0.190 ABCD | 0.153 BCDEF  | 0.085 GHI       | 0.147 BCDE  | 0.576 ABC     |
| HV-MA-BD2    | 0.214 ABCD | 0.191 ABCDE  | 0.132 ABCDEFGH  | 0.140 BCDE  | 0.575 ABC     |
| HG-MA-GIL    | 0.121 CD   | 0.086 DEF    | 0.093 DEFGHI    | 0.138 BCDE  | 0.413 BCDE    |
| HS-TE-MI     | 0.211 ABCD | 0.180 BCDEF  | 0.122 DEFGH     | 0.130 BCDE  | 0.526 ABCD    |
| HV-MA-KM     | 0.195 ABCD | 0.183 ABCDE  | 0.137 A BCDEFGH | 0.129 BCDE  | - **          |
| HV-TE-ERM    | 0.180 ABCD | 0.147 BCDEF  | 0.086 EFGHI     | 0.125 BCDE  | 0.264 DEF     |
| HS-TE-HAR    | 0.208 ABCD | 0.387 A      | 0.220 A BCDEFG  | 0.123 BCDE  | 0.502 ABCD    |
| HS-TE-AL     | 0.205 ABCD | 0.192 A BCDE | 0.115 CDEFGH    | 0.122 BCDEF | 0.702 AB      |
| HS-MA-KI     | 0.176 ABCD | 0.109 CDEF   | 0.081 GHI       | 0.121 BCDEF | 0.606 ABC     |
| HS-TE-KT     | 0.177 ABCD | 0.125 BCDEF  | 0.109 EFGH      | 0.106 CDEF  | 0.719 A       |
| HS-TE-AH     | 0.139 ABCD | 0.286 ABC    | 0.128 ABCDEFGHI | 0.104 CDEF  | 0.517 ABCD    |
| HS-MA-GIM    | 0.163 BCD  | 0.127 BCDEF  | 0.132 ABCDEFGH  | 0.100 CDEF  | 0.454 A BCDE  |
| HV-MA-BD1    | 0.166 BCD  | 0.129 BCDEF  | 0.113 DEFGH     | 0.079 DEF   | 0.598 ABC     |
| HS-TE-KA     | 0.167 BCD  | 0.130 BCDEF  | 0.077 GHI       | 0.077 DEF   | 0.658 ABC     |
| HS-TE-SH     | 0.110 CD   | 0.076 EF     | 0.079 GHI       | 0.052 EF    | 0.124 F       |
| HS-TE-NH     | 0.119 CD   | 0.059 EF     | 0.046 HI        | 0.04 EF     | 0.550 ABCD    |
| HS-TE-HA     | 0.056 D    | 0.032 F      | 0.028 I         | 0.015 F     | 0.180 EF      |

Different letters differ significantly, as determined by Tukey's highly significant difference test, at  $P < 0.05$ . \*Correlation between rate of progress on detached leaves and saprophytic medium were tested by Pearson correlation coefficient and found significant ( $r=0.681$ ,  $P < 0.0001$ ). \*\*The isolates showed high difference between the replicate due to differences in freshness of the agar plate.
