# Supplementary figures and images for: Characterization of the Barley Net Blotch Pathosystem at the Center of Origin of Host and Pathogen
Source: MDPI journal article supplement (doi:10.3390/pathogens8040275), 2019-11-29

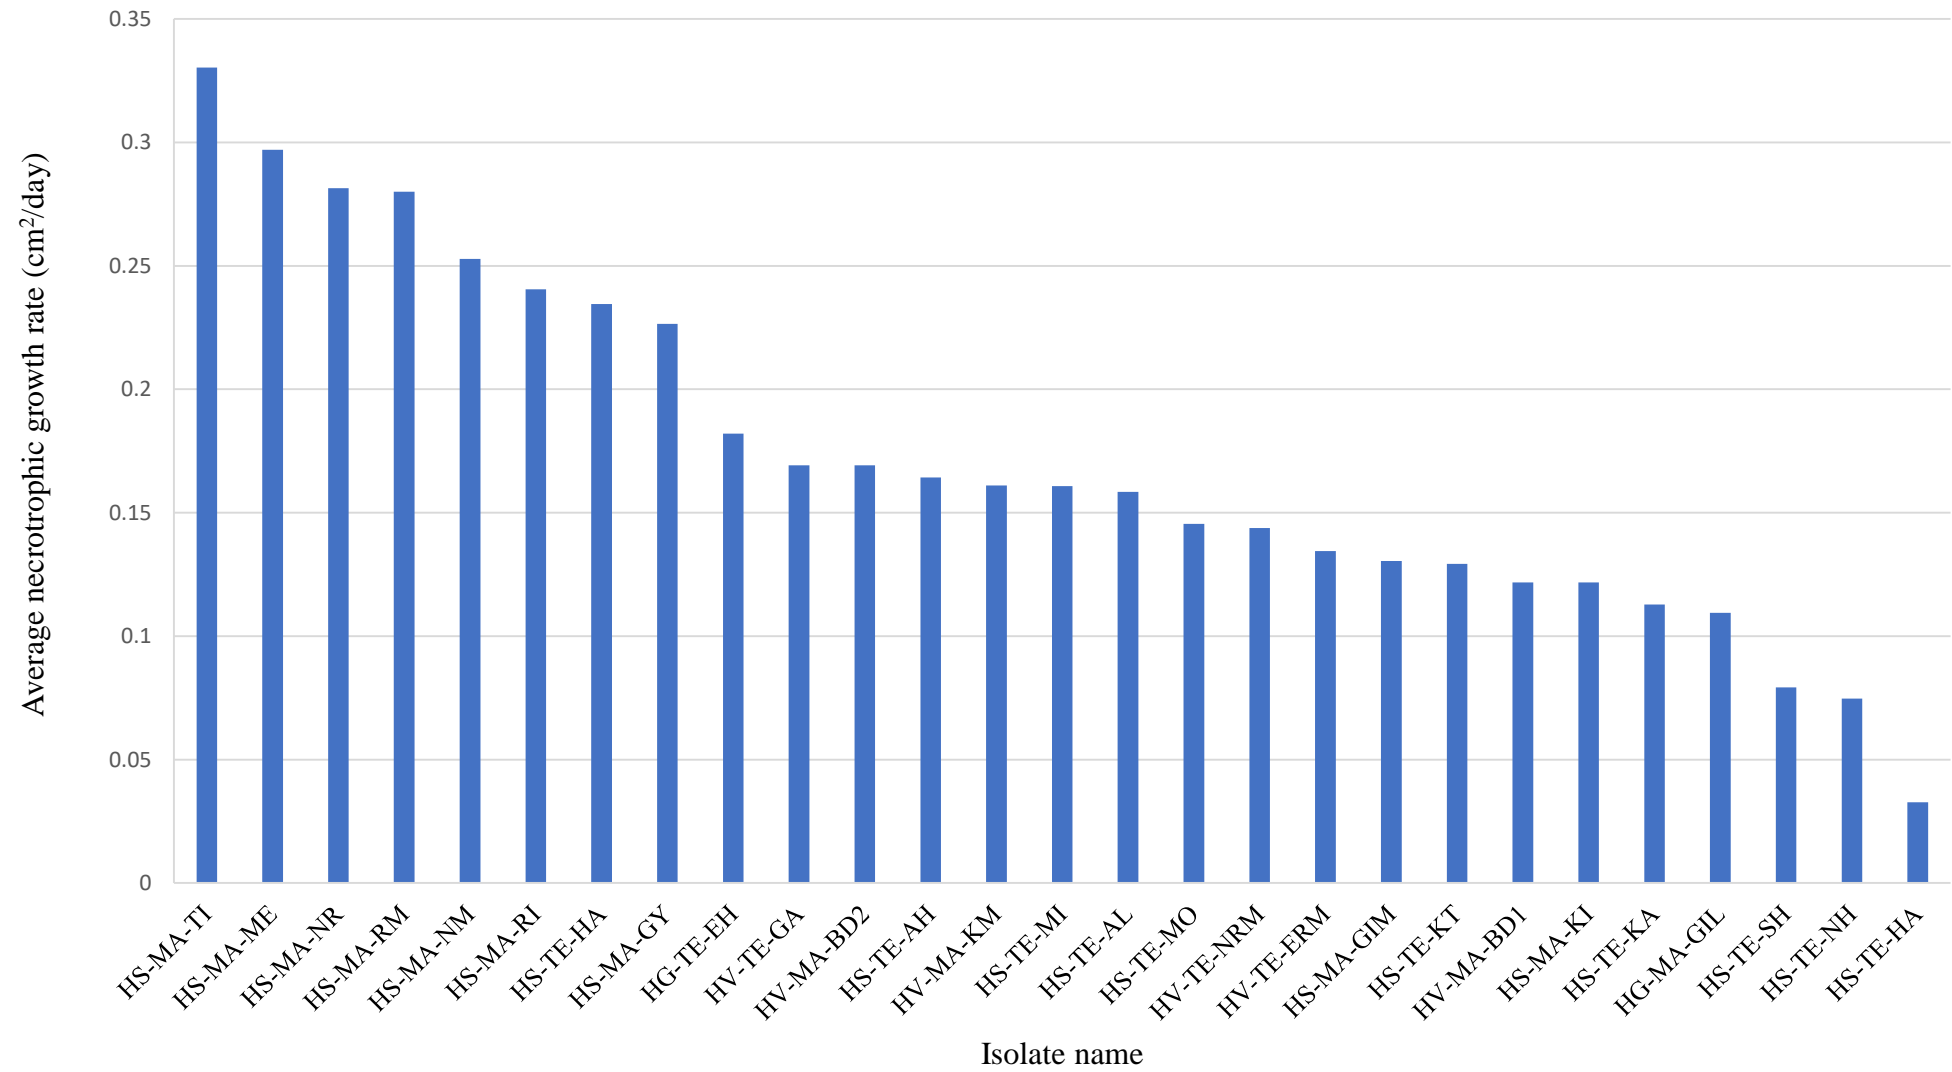

Supplement: s1 [file s1]
